# Supplementary material
Source: PubMed Central journal article supplement (PMC3545652)
Supplement: NIHMS417007-supplement-Figures.pdf [file NIHMS417007-supplement-Figures.pdf]

Immunity, Volume 29  
**Supplemental Data**

**Plasmacytoid Dendritic Cells Mediate Oral Tolerance**

Anne Goubier, Bertrand Dubois, Hanane Gheit, Grégoire Joubert, Florence Villard-Truc,  
Carine Asselin-Paturel, Giorgio Trinchieri, and Dominique Kaiserlian

**Please find Figures S1-S4 below.**

**A**Phenotype of CD11c<sup>+</sup> liver cell subsets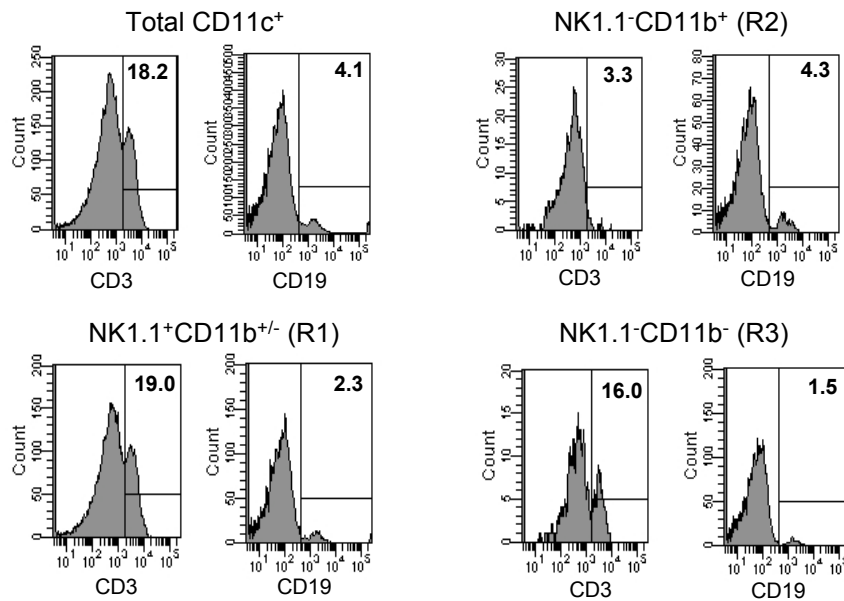**B**Phenotype of CD11c<sup>+</sup>CD11b<sup>-</sup>NK1.1<sup>-</sup> liver cells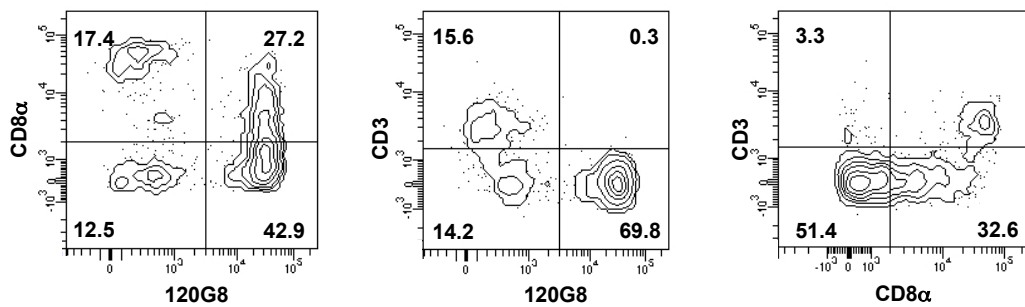**C**Phenotype of 120G8<sup>+</sup> liver cells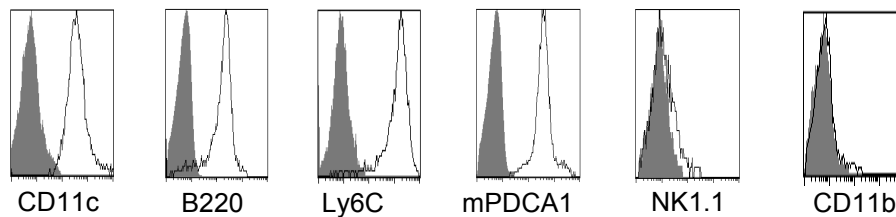**Figure S1: Phenotype of liver CD11c<sup>+</sup> subsets**

(A,B) Liver leukocytes were stained for 6C flow cytometry with anti-BST2-Alexa488 (120G8 mAb), anti-NK1.1-PE, anti-CD11b-PerCP-Cy5.5, anti-CD11c-APC, anti-CD8-PE-Cy7 and either biotinylated anti-CD3 or anti-CD19 mAb followed by incubation with APC-Cy7-labeled-streptavidin. Cells were analyzed with a FACSCanto using the DIVA software (BD Biosciences). (A) Frequency of T and B cells in the various subsets of CD11c<sup>+</sup> liver cells depicted in Fig. 3B. (B) Frequency of BST-2<sup>+</sup> pDC in liver CD11c<sup>+</sup>NK1.1<sup>-</sup>CD11b<sup>-</sup> cells. (C) 120G8<sup>+</sup> liver cells were analyzed by flow cytometry for the expression of CD11c, CD11b, B220, Ly6C, BST2 (mPDCA1 mAb) and NK1.1 using specific mAbs (white histograms). Staining with isotype-matched irrelevant antibodies was used as a negative control (grey histograms). These data are representative of 2 (A,B) to 4 experiments (C).

**Goubier et al. Supplementary Fig. 1**

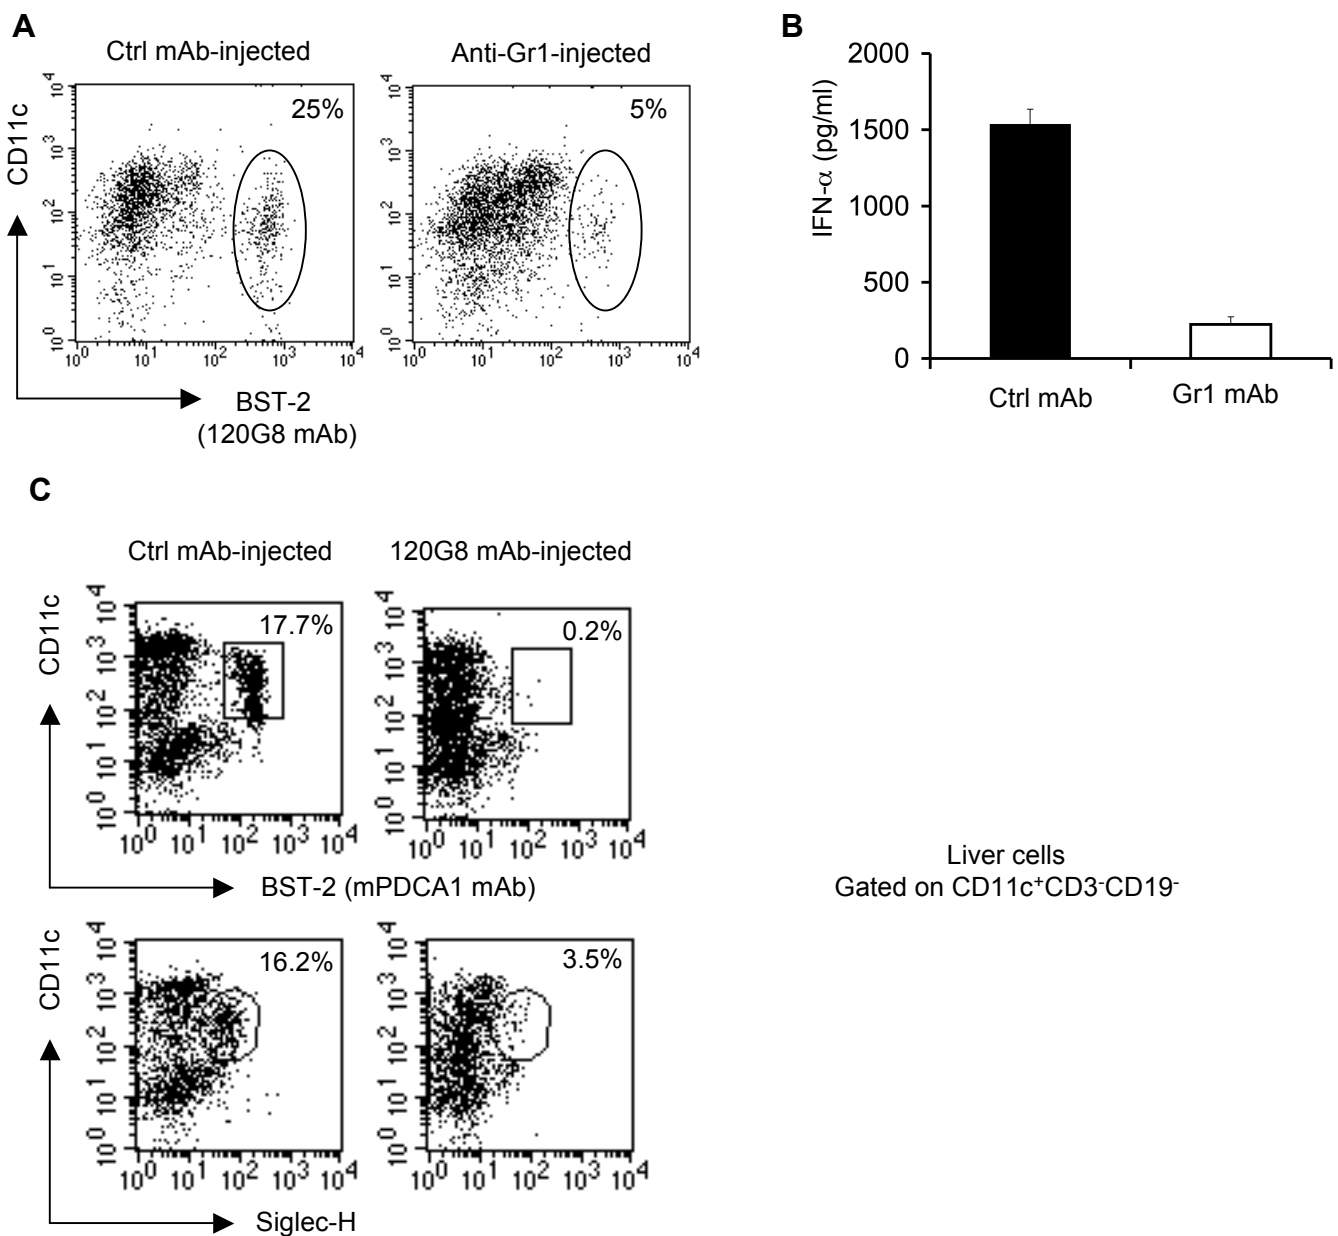

**Figure S2: efficacy of pDC depletion in vivo**

(A, B) Efficiency of pDC depletion following anti-Gr1 mAb treatment was analyzed on MACS-sorted liver CD11c<sup>+</sup> leukocytes 48 hours after the last mAb injection by flow cytometry analysis of CD11c and BST-2 (120G8 mAb) expression (A) or ability to produce IFN- $\alpha$  upon virus exposure (B). Briefly, cells ( $10^6$  cells/ml) were cultured with  $10^4$  hemagglutinin units/ml of formaldehyde-inactivated human influenza virus (strain New Caledonia, NK/TM/138/00, From Aventis Pasteur, Val de Reuil, France). IFN- $\alpha$  production in 18-h culture supernatant was titrated using an ELISA kit (PBL Biomedical laboratories, Newbrunswick, NJ). (C) Efficacy of pDC depletion following 120G8 treatment was checked by analysis of CD11c and BST-2 (mPDCA1 mAb) and CD11c and Siglec-H (440c mAb) expression on liver CD3<sup>-</sup>CD19<sup>-</sup> leukocytes 48 hours after the last mAb injection .

**A** MACS-enriched pDC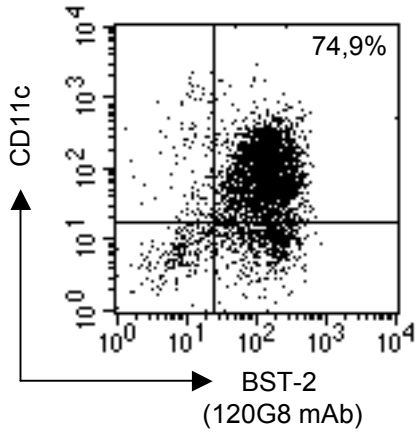**B** FACSsorted pDC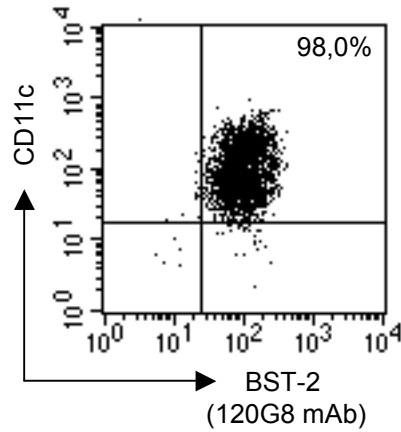**C** Phenotype of CD11c<sup>int</sup>BST2<sup>+</sup> liver cells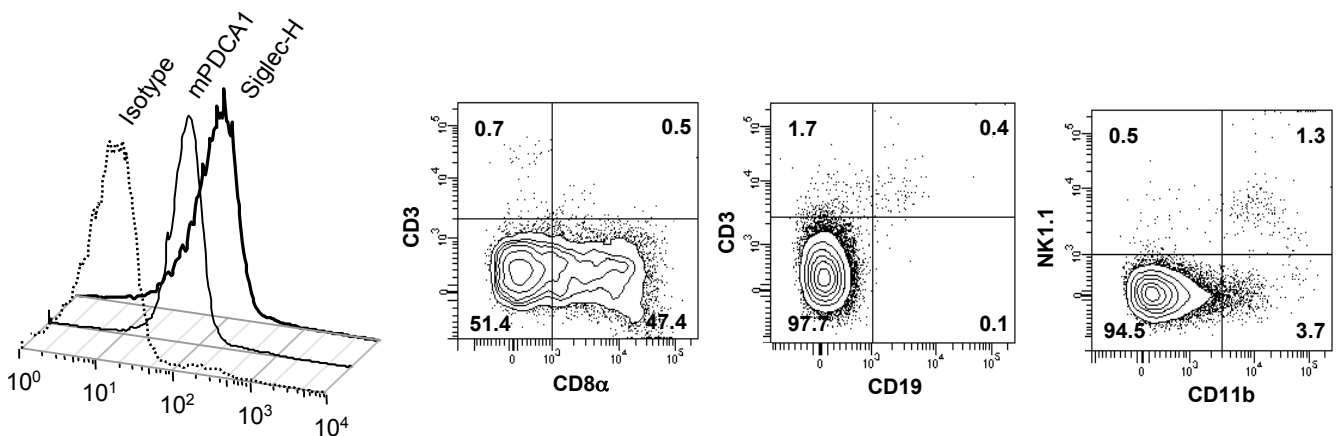**Figure S3: Purity of liver pDC used for transfer experiments**

(A) pDC were enriched by MACSsorting from leukocytes using mPDCA1-coated microbeads and analyzed for the expression of CD11c and BST-2 (120G8 mAb). MACS-enriched pDC contained 70-80% CD11c<sup>int</sup>BST-2<sup>+</sup> cells (mean: 76.8%).

(B) For certain adoptive transfer experiments MACS-enriched pDC were further stained with Alexa488-conjugated anti-BST2 (120G8 mAb) and PE-anti-CD11c and FACSsorted into CD11c<sup>int</sup>BST-2<sup>+</sup> cells (>97% purity).

(C) CD11c<sup>int</sup>BST-2<sup>+</sup> cells were stained with biotinylated anti-Siglec-H (440c) or anti-BST2 (mPDCA1) mAb and streptavidin-PerCP-Cy5.5, or combination of anti-CD8α-PE and -CD3-PerCP-Cy5.5, anti-CD3-PE and -CD19-PerCP-Cy5.5, anti-NK1.1-PE and -CD11b-PerCP-Cy5.5, and analyzed by 4C flow cytometry using a FACSCanto (BD Biosciences).

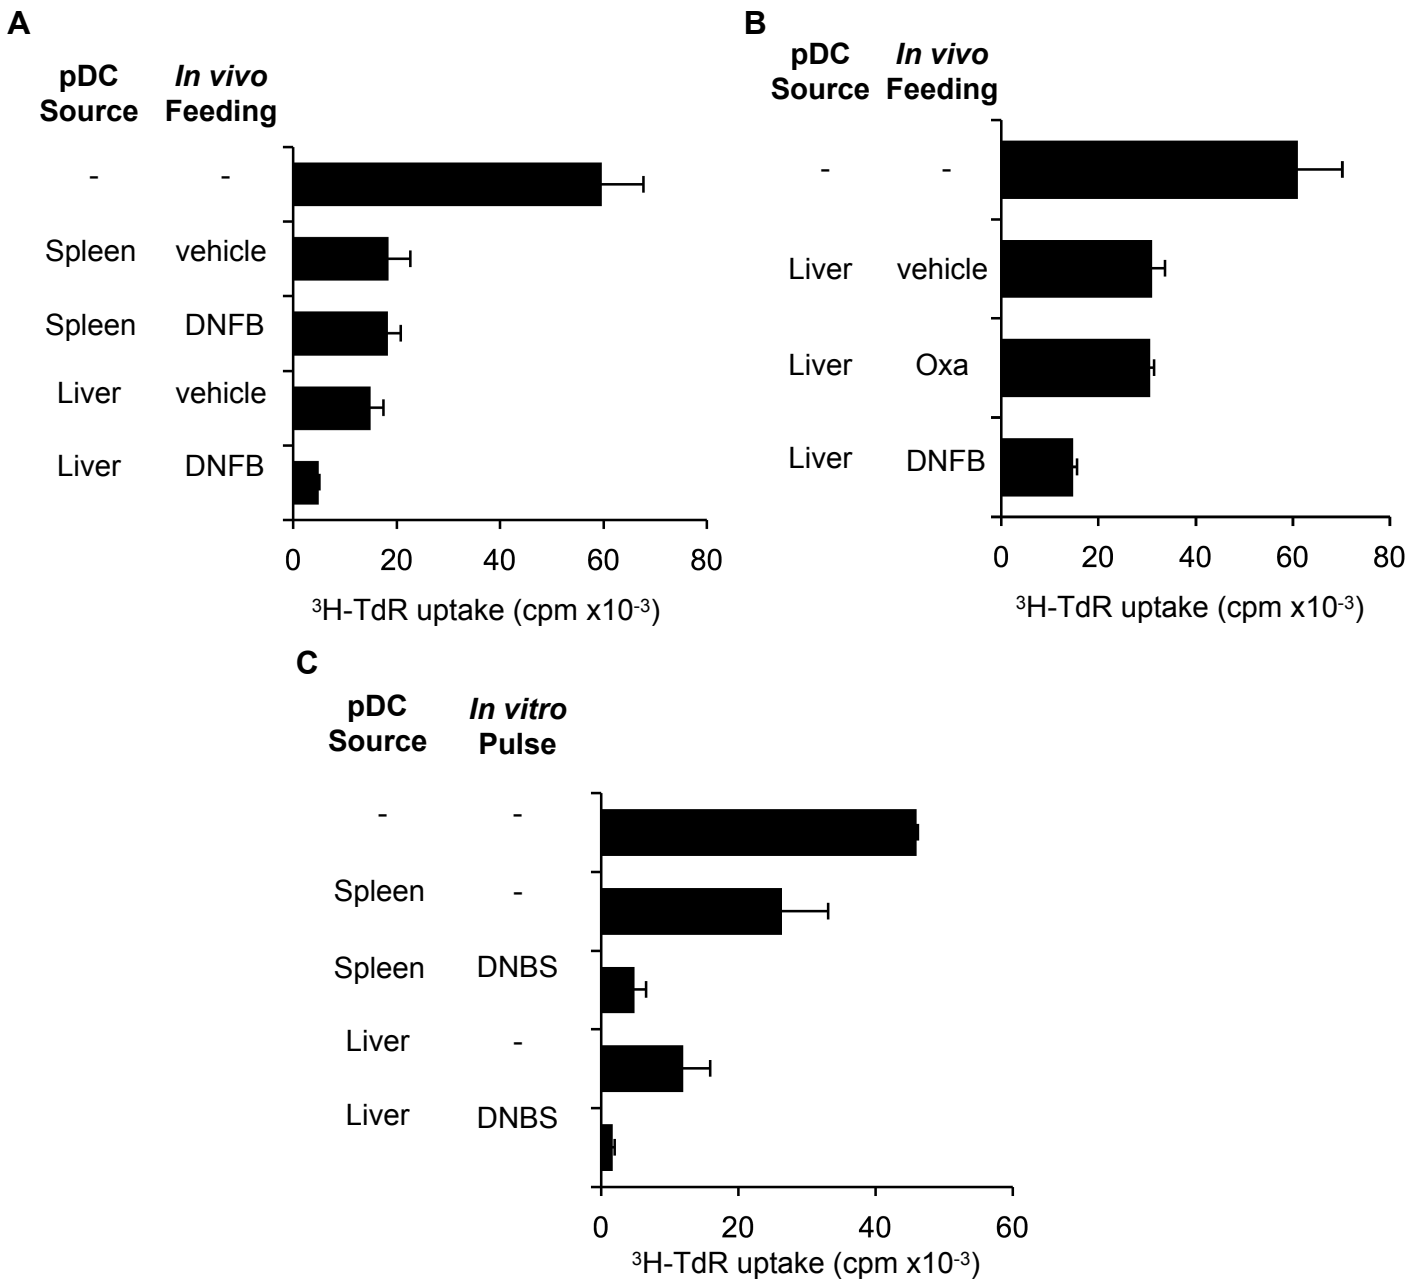

**Figure S4: Liver pDC suppress the proliferation of hapten-specific CD8<sup>+</sup> T cells in vitro**

Hapten-specific CD8<sup>+</sup> T cells purified from DNFB-sensitized mice were cultured for 3 days with DNBS-pulsed BM-DC in the presence or absence of *ex vivo* purified pDC. (A-B) pDC were MACS-enriched from the liver or spleen of mice that were fed 18 hours earlier with DNFB, OXA or vehicle as control. (C) pDC were MACS-enriched from the liver of naïve mice and pulsed with DNBS *in vitro* before culture with CD8<sup>+</sup> T cells. T cell proliferation was determined by [<sup>3</sup>H]thymidine uptake during the last 8 h of culture. Results are expressed as mean of cpm ± SD of triplicate wells. No cpm above background were detected in cultures with un-pulsed BM-DC (not shown). Data are representative of 1 out of 2 experiments.
